# Supplementary material for: Hästens behov av social kontakt - hur tillgodoser man den?
Source: MDPI journal article supplement (doi:10.3390/jcdd9040115), 2010-07-04
Supplement: s1 [file s1]

**Table S1.** Summary of Clinical Trials on EA, LVNC, or EA/LVNC.

| Trial ID                                     | Final Yr. Estimate | EA or LVNC | Study Type                 | Abbreviated Title                                                          | Patients                            | Outcome Measures                                                                                                                   | Locations                                                                                                                                           |
|----------------------------------------------|--------------------|------------|----------------------------|----------------------------------------------------------------------------|-------------------------------------|------------------------------------------------------------------------------------------------------------------------------------|-----------------------------------------------------------------------------------------------------------------------------------------------------|
| NCT00497705<br><i>Completed</i>              |                    | EA         | Prospective observational  | Genes Causing EA                                                           | 2 yrs. or older                     |                                                                                                                                    | NIH Clinical Center, U.S.A.<br>Republican Scientific and Clinical Cardiology Center, Belarus<br>Amosov Institute of Cardiovascular Surgery, Ukraine |
| NCT01907971<br><i>Completed</i>              | 2015               | EA         | Prospective observational  | Assessment of LV and RV Function in EA patients via different ECHO Methods | 18 patients aged 11 - 80 yrs.       | RV volume and function by VentriPoint<br>Structural myocardial changes in LV (Strain)<br>Correlate findings with clinical symptoms | University Children's Hospital, Switzerland                                                                                                         |
| NCT02914171<br><i>Active, not recruiting</i> | 2022               | EA         | Nonrandomized intervention | Autologous Bone Marrow Derived Mononuclear Cells for EA Treatment          | 10 patients aged 6 months-30 yrs.   | Number and severity of adverse events and prognostic markers from start of procedure                                               | Mayo Clinic, Rochester, U.S.A.                                                                                                                      |
| NCT02885363<br><i>Unknown</i>                | 2018               | LVNC       | Nonrandomized intervention | Prognosis of Isolated Adult LVNC                                           | 220 patients aged 18 yrs. and older | Occurrence of death, cardiac transplantation, and cardiac-related hospitalization                                                  | Assistance Publique-Hopitaux de Marseille, France                                                                                                   |
| NCT01481298<br><i>Completed</i>              | 2008               | LVNC       | Prospective observational  | Value of CMR Derived Parameters for LVNC Diagnosis                         | 57 patients aged 14-64 yrs.         | Nonrandomized Intervention for Diagnosis of LVNC                                                                                   | University of Leipzig - Heart Center, Germany                                                                                                       |
| NCT01470014<br><i>Completed</i>              | 2014               | LVNC       | Prospective observational  | Cardiac CT: Characteristics of Isolated LVNC                               | 39 patients aged 30-90 yrs.         |                                                                                                                                    | Zurich, Switzerland                                                                                                                                 |
| NCT02568072<br><i>Completed</i>              | 2016               | LVNC       | Prospective observational  | Training-induced Increased Left Ventricular Trabeculation                  | 120 patients aged 18-35 yrs.        | NC:C ratio and peak Oxygen after exercise test                                                                                     | Barts Heart Centre, United Kingdom                                                                                                                  |
| NCT03076580<br><i>Unknown</i>                | 2021               | LVNC       | Prospective observational  | An Integrative-"Omics" Study of Cardiomyopathy                             | 2000 patients of all ages           | Influence of genetic variation in clinical cardiomyopathy outcomes and identifying novel biomarkers using                          | Beijing Institute of heart, lung and blood vessel diseases, China                                                                                   |

|                                                        |      |      |                           | Patients for Diagnosis and Prognosis in China                                                                                    |                                      | proteomics, microRNA-seq, and metabolomics                                                                    |                                                                                                 |
|--------------------------------------------------------|------|------|---------------------------|----------------------------------------------------------------------------------------------------------------------------------|--------------------------------------|---------------------------------------------------------------------------------------------------------------|-------------------------------------------------------------------------------------------------|
| NCT03061994<br><i>Unknown</i>                          | 2020 | LVNC | Prospective observational | Metabolomic Study of All-age Cardiomyopathy                                                                                      | 1000 patients of all ages            | Metabolomic profile of cardiomyopathy patients                                                                | Beijing Institute of heart, lung and blood vessel diseases, China                               |
| NCT03572569<br><i>Unknown</i>                          | 2020 | LVNC | Prospective observational | Risk Stratification in Children and Adolescents with Primary Cardiomyopathy                                                      | 200 patients aged up to 18 yrs.      | Major cardiovascular events of pediatric patients with primary cardiomyopathy and first-degree family members | The Charité – Universitätsmedizin Berlin, Germany<br>German Heart Institute, Germany            |
| NCT02432092<br><i>Recruiting</i>                       | 2028 | LVNC | Prospective observational | <b>Pediatric Cardiomyopathy Mutation Analysis</b>                                                                                | <b>300 patients of all ages</b>      | <b>Molecular genetics of cardiomyopathy</b>                                                                   | <b>IU School of Medicine, U.S.A.</b>                                                            |
| NCT04265040<br><i>Recruiting</i>                       | 2027 | LVNC | Prospective observational | <b>DZHK TORCH-Plus is a Registry for Patients with Cardiomyopathies and Serves as Source for Cardiovascular Research Studies</b> | <b>2040 patients aged 18-80 yrs.</b> | <b>All-cause mortality</b>                                                                                    | <b>University Hospital Heidelberg - Clinic of Cardiology, Angiology and Pneumology, Germany</b> |
| 2019-003626-24<br><i>*Unknown status due to Brexit</i> |      | LVNC |                           | <i>Primary Dilated Cardiomyopathy due to either MYH7 or TTN Variants.</i>                                                        |                                      |                                                                                                               |                                                                                                 |

Note: Trials in boldface text are ongoing as of February 2022. CMR: Cardiac Magnetic Resonance Imaging, CT: Computerized Tomography, EA: Ebstein's Anomaly, LVNC: Left Ventricular Noncompaction.
